# Supplementary material
Source: PubMed Central journal article supplement (PMC3273721)
Supplement: mmc1.pdf [file mmc1.pdf]

# THE LANCET

## **Supplementary webappendix**

This webappendix formed part of the original submission and has been peer reviewed. We post it as supplied by the authors.

Supplement to: Mwaniki MK, Atieno M, Lawn JE, Newton CRJC. Long-term neurodevelopmental outcomes after intrauterine and neonatal insults: a systematic review. *Lancet* 2012; published online Jan 13. DOI:10.1016/S0140-6736(11)61577-8.

---

Diagnostic criteria for the insult during [pregnancy or the neonatal period]

---

| <b><i>Neonatal Insult</i></b>          | <b>Diagnostic criteria</b>                                                                                                                                                                                                                                                                                                                                                                                                                                                                 |
|----------------------------------------|--------------------------------------------------------------------------------------------------------------------------------------------------------------------------------------------------------------------------------------------------------------------------------------------------------------------------------------------------------------------------------------------------------------------------------------------------------------------------------------------|
| <i>Neonatal Jaundice</i>               | <ul style="list-style-type: none"><li>• Significant jaundice based on bilirubin level for age and weight of newborn based on internationally accepted criteria [39] [40]</li><li>• Non-obstructive jaundice [41]</li></ul>                                                                                                                                                                                                                                                                 |
| <i>Neonatal Tetanus</i>                | <ul style="list-style-type: none"><li>• Initially well and then onset of spasms that maybe provoked or spontaneous</li><li>• Trismus and difficulty feeding</li></ul>                                                                                                                                                                                                                                                                                                                      |
| <i>Neonatal Meningitis</i>             | <ul style="list-style-type: none"><li>• Cerebrospinal fluid (CSF) culture positive for a causative organisms</li></ul> <p><b>Or</b> positive antigen test [42]</p> <ul style="list-style-type: none"><li>• White cell count in cerebrospinal fluid of more than 50 cells per microlitre [42]<ul style="list-style-type: none"><li>○ Positive blood culture and/or gram stain</li><li>○ Glucose blood/CSF ratio &lt; 0.1</li><li>○</li></ul></li></ul>                                      |
| <i>Neonatal Sepsis</i>                 | <ul style="list-style-type: none"><li>• Positive blood culture</li><li>• Clinical definition of neonatal sepsis based on an accepted algorithm</li></ul>                                                                                                                                                                                                                                                                                                                                   |
| <i>Hypoxic Ischemic Encephalopathy</i> | <ul style="list-style-type: none"><li>• Onset within 2 days of birth of severe or moderate neonatal encephalopathy in infants born at 34 or more weeks of gestation</li><li>• Acute perinatal event, and/or a 10 minute APGAR less than 5 or assisted ventilation for more than 10 minutes.</li><li>• Ideally also the following:<ul style="list-style-type: none"><li>○ Evidence of metabolic acidosis (pH &lt;7 or less or base deficit &lt; 12 mmol per liter [43])</li></ul></li></ul> |

---

- 
- Other identifiable aetiologies such as trauma, coagulation disorders, infectious conditions, or genetic disorders were excluded [43].
- 

*Preterm birth*

Documentation of gestation age below 37 completed weeks by:-

- Where last menstrual period is known and expected date of delivery can be calculated
  - Acceptable gestation age estimation criteria with
    - Ultrasound, ideally first trimester
    - Dubowitz score [44]
    - Other clinical scores with validation published eg Eregie [45]
- 

*HIV*

- Polymerase Chain Reactions (PCR) test that shows infection with the HIV virus,
- 

*Toxoplasmosis*

- Serological diagnosis of infection in the mother through seroconversion, presence of IgA and IgM, low avidity IgG, or PCR in amniotic fluid [46, 47]
  - Immunological diagnosis in the newborn with suggestive clinical history [46, 47]
  - Histological diagnosis of the central nervous system tissues where post-mortem is done
- 

*Rubella*

- Clinical diagnosis based on the classical triad of congenital heart disease, deafness and congenital cataracts, and history of maternal infection
  - Ideally also supportive laboratory evidence such as
    - increased antibody titres
    - Persistence of rubella-specific IgG in the infant after 6 to 12 months
    - Virus isolation from any site such as fetal blood or chorionic villus biopsy
- 

*Cytomegalovirus*

- Documentation of maternal infections by either IgG avidity testing or documented seroconversion
-

- 
- Detection of virus in the newborn from urine, saliva or blood

---

*Herpes*

- Isolation of Herpes simplex virus (HSV) from skin lesions, CSF, urine, throat, nasopharynx or conjunctivae
- Detection of HSV DNA in CSF by PCR

---

Syphilis

- High neonatal antibody titres:  $\geq 4$  times above the maternal levels
  - Positive rapid plasma regain or venereal disease research laboratory [VDRL]) will also be considered
  - Laboratory microscopic visualization of spirochetes
-

---

Search Terms

---

| <b>Search element</b> | <b>MEDLINE</b>           | <b>EMBASE</b>            | <b>PSYCHINFO</b>         | <b>CINHAL</b>                           |
|-----------------------|--------------------------|--------------------------|--------------------------|-----------------------------------------|
| <b>Exposure</b>       | Thesaurus terms exploded | Thesaurus terms exploded | Thesaurus terms exploded | Thesaurus terms exploded                |
|                       | Jaundice                 | Jaundice                 | Jaundice                 | Jaundice                                |
|                       | Tetanus                  | Tetanus                  | Tetanus                  | MH                                      |
|                       | Meningitis               | Meningitis               | Meningitis               | "Hyperbilirubinemia, Neonatal+"I        |
|                       | Sepsis                   | Sepsis                   | Sepsis                   | Infections                              |
|                       | Preterm birth            | Preterm birth            | Preterm birth            |                                         |
|                       | Birth asphyxia           | Birth asphyxia           | Birth asphyxia           | Infant, premature                       |
|                       | HIV                      | HIV                      | HIV                      | MH "Asphyxia Neonatorum"                |
|                       | Toxoplasmosis            | Toxoplasmosis            | Toxoplasmosis            |                                         |
|                       | Rubella                  | Rubella                  | Rubella                  | MH "Birth Injuries+"Syphilis, congenial |
|                       | Cytomegalovirus          | Cytomegalovirus          | Cytomegalovirus          |                                         |
|                       | Herpes                   | Herpes                   | Herpes                   |                                         |
|                       | Syphilis                 | Syphilis                 | Syphilis                 |                                         |
|                       | +Subheadings:            |                          |                          |                                         |
|                       | Complications            |                          |                          |                                         |

---

---

Diagnosis

Epidemiology

Aetiology

Mortality

Prevention/control

Psychology

Rehabilitation

Therapy

---

---

**Keywords** Sequel\* OR Outcome\*OR  
Morbidity OR Prognosis  
OR Impairment OR Deficit  
OR follow-up OR long-  
term OR Incidence OR  
Prevalence

---

| <b>Outcome</b> | Thesaurus terms exploded       | Thesaurus terms exploded | Thesaurus terms exploded | Thesaurus terms exploded                        |
|----------------|--------------------------------|--------------------------|--------------------------|-------------------------------------------------|
|                | Neurological impairment        | Neurological impairment  | Neurological impairment  | MH "Outcomes of Prematurity"                    |
|                | Neurologic manifestation       |                          |                          | MH "Outcomes (Health Care)+"                    |
|                | Dyskinesias                    |                          |                          | MH "Treatment Outcomes+"                        |
|                | Gait Disorders                 |                          |                          | MH "Outcome Assessment"                         |
|                | Neurobehavioral manifestations |                          |                          | MH "Problem Rating Scale for Outcomes (Omaha)+" |
|                | Neuromuscular manifestations   |                          |                          |                                                 |
|                | Meningism                      |                          |                          |                                                 |
|                | Pain                           |                          |                          |                                                 |

---

|           |                    |     |     |                 |
|-----------|--------------------|-----|-----|-----------------|
|           | Paralysis          |     |     |                 |
|           | Paresis            |     |     |                 |
|           | Reflex-abnormal    |     |     |                 |
|           | Seizures           |     |     |                 |
|           | Sensation disorder |     |     |                 |
|           | Voice Disorders    |     |     |                 |
| Populatio | Age=newborn        |     |     | Infant, newborn |
| Language  | All                | All | All | All             |



## References of publications reviewed

### Preterm births

1. Constantinou, J.C., E.N. Adamson-Macedo, M. Mirmiran, R.L. Ariagno, and B.E. Fleisher, *Neurobehavioral assessment predicts differential outcome between VLBW and ELBW preterm infants*. J Perinatol, 2005. **25**(12): p. 788-93.
2. Gallo, J.E., G. Holmstrom, U. Kugelberg, B. Hedquist, and G. Lennerstrand, *Regressed retinopathy of prematurity and its sequelae in children aged 5-10 years*. Br J Ophthalmol, 1991. **75**(9): p. 527-31.
3. Aida, N., G. Nishimura, Y. Hachiya, K. Matsui, M. Takeuchi, and Y. Itani, *MR imaging of perinatal brain damage: comparison of clinical outcome with initial and follow-up MR findings*. AJNR Am J Neuroradiol, 1998. **19**(10): p. 1909-21.
4. Kubota, T., A. Okumura, F. Hayakawa, T. Kato, K. Itomi, K. Kuno, and K. Watanabe, *Combination of neonatal electroencephalography and ultrasonography: sensitive means of early diagnosis of periventricular leukomalacia*. Brain Dev, 2002. **24**(7): p. 698-702.
5. Miller, S.P., D.M. Ferriero, C. Leonard, R. Piecuch, D.V. Glidden, J.C. Partridge, M. Perez, P. Mukherjee, D.B. Vigneron, and A.J. Barkovich, *Early brain injury in premature newborns detected with magnetic resonance imaging is associated with adverse early neurodevelopmental outcome*. J Pediatr, 2005. **147**(5): p. 609-16.
6. Goldenberg, R.L., M.B. DuBard, S.P. Cliver, K.G. Nelson, K. Blankson, S.L. Ramey, and A. Herman, *Pregnancy outcome and intelligence at age five years*. Am J Obstet Gynecol, 1996. **175**(6): p. 1511-5.
7. Ment, L.R., D.T. Scott, R.A. Ehrenkranz, S.G. Rothman, C.C. Duncan, and J.B. Warshaw, *Neonates of less than or equal to 1,250 grams birth weight: prospective neurodevelopmental evaluation during the first year post-term*. Pediatrics, 1982. **70**(2): p. 292-6.
8. Ment, L.R., B. Vohr, W. Allan, K.H. Katz, K.C. Schneider, M. Westerveld, C.C. Duncan, and R.W. Makuch, *Change in cognitive function over time in very low-birth-weight infants*. Jama, 2003. **289**(6): p. 705-11.

9. Kaukola, T., R. Herva, M. Perhomaa, E. Paakko, S. Kingsmore, L. Vainionpaa, and M. Hallman, *Population cohort associating chorioamnionitis, cord inflammatory cytokines and neurologic outcome in very preterm, extremely low birth weight infants*. *Pediatr Res*, 2006. **59**(3): p. 478-83.
10. Guit, G.L., M. van de Bor, L. den Ouden, and J.H. Wondergem, *Prediction of neurodevelopmental outcome in the preterm infant: MR-staged myelination compared with cranial US*. *Radiology*, 1990. **175**(1): p. 107-9.
11. Brandt, P., D. Magyary, M. Hammond, and K. Barnard, *Learning and behavioral--emotional problems of children born preterm at second grade*. *J Pediatr Psychol*, 1992. **17**(3): p. 291-311.
12. Fallang, B., I. Oien, E. Hellem, O.D. Saugstad, and M. Hadders-Algra, *Quality of reaching and postural control in young preterm infants is related to neuromotor outcome at 6 years*. *Pediatr Res*, 2005. **58**(2): p. 347-53.
13. Herrgard, E.A., M. Karvonen, L. Luoma, P. Saavalainen, S. Maatta, E. Laukkanen, and J. Partanen, *Increased number of febrile seizures in children born very preterm: relation of neonatal, febrile and epileptic seizures and neurological dysfunction to seizure outcome at 16 years of age*. *Seizure*, 2006. **15**(8): p. 590-7.
14. Jongmans, M., E. Mercuri, L. de Vries, L. Dubowitz, and S.E. Henderson, *Minor neurological signs and perceptual-motor difficulties in prematurely born children*. *Arch Dis Child Fetal Neonatal Ed*, 1997. **76**(1): p. F9-14.
15. Bennett, F.C., N.M. Robinson, and C.J. Sells, *Growth and development of infants weighing less than 800 grams at birth*. *Pediatrics*, 1983. **71**(3): p. 319-23.
16. Perrott, S., L. Dodds, and M. Vincer, *A population-based study of prognostic factors related to major disability in very preterm survivors*. *J Perinatol*, 2003. **23**(2): p. 111-6.
17. Seme-Ciglenceki, P., *Predictive values of cranial ultrasound and assessment of general movements for neurological development of preterm infants in the Maribor region of Slovenia*. *Wien Klin Wochenschr*, 2007. **119**(15-16): p. 490-6.
18. Schmidt, B., E.V. Asztalos, R.S. Roberts, C.M. Robertson, R.S. Sauve, and M.F. Whitfield, *Impact of bronchopulmonary dysplasia, brain injury, and severe retinopathy on the outcome of extremely low-birth-weight infants at 18 months: results from the trial of indomethacin prophylaxis in preterms*. *Jama*, 2003. **289**(9): p. 1124-9.

19. Wilson-Costello, D., H. Friedman, N. Minich, A.A. Fanaroff, and M. Hack, *Improved survival rates with increased neurodevelopmental disability for extremely low birth weight infants in the 1990s*. Pediatrics, 2005. **115**(4): p. 997-1003.
20. Wood, N.S., N. Marlow, K. Costeloe, A.T. Gibson, and A.R. Wilkinson, *Neurologic and developmental disability after extremely preterm birth*. EPICure Study Group. N Engl J Med, 2000. **343**(6): p. 378-84.
21. Couser, R.J., R.E. Hoekstra, T.B. Ferrara, G.B. Wright, A.K. Cabalka, and J.E. Connett, *Neurodevelopmental follow-up at 36 months' corrected age of preterm infants treated with prophylactic indomethacin*. Arch Pediatr Adolesc Med, 2000. **154**(6): p. 598-602.
22. Kumar, S.P., E.K. Anday, L.M. Sacks, R.Y. Ting, and M. Delivoria-Papadopoulos, *Follow-up studies of very low birth weight infants (1,250 grams or less) born and treated within a perinatal center*. Pediatrics, 1980. **66**(3): p. 438-44.
23. Ipata, A.E., G. Cioni, A. Boldrini, P. Bottai, and J. van Hof-van Duin, *Visual acuity of low- and high-risk neonates and acuity development during the first year*. Behav Brain Res, 1992. **49**(1): p. 107-14.
24. Cherkes-Julkowski, M., *Learning disability, attention-deficit disorder, and language impairment as outcomes of prematurity: a longitudinal descriptive study*. J Learn Disabil, 1998. **31**(3): p. 294-306.
25. Kitchen, W., G.W. Ford, L.W. Doyle, A.L. Rickards, J.V. Lissenden, R.J. Pepperell, and J.E. Duke, *Cesarean section or vaginal delivery at 24 to 28 weeks' gestation: comparison of survival and neonatal and two-year morbidity*. Obstet Gynecol, 1985. **66**(2): p. 149-57.
26. Samsom, J.F. and L. de Groot, *Study of a group of extremely preterm infants (25-27 weeks): how do they function at 1 year of age?* J Child Neurol, 2001. **16**(11): p. 832-7.
27. Silva, P.A., R. McGee, and S. Williams, *A longitudinal study of the intelligence and behavior of preterm and small for gestational age children*. J Dev Behav Pediatr, 1984. **5**(1): p. 1-5.
28. Sostek, A.M., Y.F. Smith, K.S. Katz, and E.G. Grant, *Developmental outcome of preterm infants with intraventricular hemorrhage at one and two years of age*. Child Dev, 1987. **58**(3): p. 779-86.

29. Whitaker, A., J. Johnson, S. Sebris, J. Pinto, G. Wasserman, R. Kairam, D. Shaffer, and N. Paneth, *Neonatal cranial ultrasound abnormalities: association with developmental delay at age one in low birth weight infants*. J Dev Behav Pediatr, 1990. **11**(5): p. 253-60.
30. Weisglas-Kuperus, N., M. Uleman-Vleeschdrager, and W. Baerts, *Ventricular haemorrhages and hypoxic-ischaemic lesions in preterm infants: neurodevelopmental outcome at 3 1/2 years*. Dev Med Child Neurol, 1987. **29**(5): p. 623-9.
31. Wallace, I.F., S.A. Rose, C.M. McCarton, D. Kurtzberg, and H.G. Vaughan, Jr., *Relations between infant neurobehavioral performance and cognitive outcome in very low birth weight preterm infants*. J Dev Behav Pediatr, 1995. **16**(5): p. 309-17.
32. *Surgery and the tiny baby: sensorineural outcome at 5 years of age. The Victorian Infant Collaborative Study Group*. J Paediatr Child Health, 1996. **32**(2): p. 167-72.
33. *Outcome at 2 years of children 23-27 weeks' gestation born in Victoria in 1991-92. The Victorian Infant Collaborative Study Group*. J Paediatr Child Health, 1997. **33**(2): p. 161-5.
34. Msall, M.E., B.T. Rogers, G.M. Buck, S. Mallen, N.L. Catanzaro, and L.C. Duffy, *Functional status of extremely preterm infants at kindergarten entry*. Dev Med Child Neurol, 1993. **35**(4): p. 312-20.
35. Ohlweiler, L., L. Alfano, and N.T. Rotta, *Evolutional neurologic evaluation of seven year-old children born prematurely*. Arq Neuropsiquiatr, 1996. **54**(3): p. 369-74.
36. den Ouden, L., M. van de Bor, F. van Bel, H. Janssen, R. Brand, and J.H. Ruys, *Serum CK-BB activity in the preterm infant and outcome at two and four years of age*. Dev Med Child Neurol, 1990. **32**(6): p. 509-14.
37. Kilbride, H.W. and D.K. Daily, *Survival and subsequent outcome to five years of age for infants with birth weights less than 801 grams born from 1983 to 1989*. J Perinatol, 1998. **18**(2): p. 102-6.
38. Herrgard, E., S. Karjalainen, A. Martikainen, and K. Heinonen, *Hearing loss at the age of 5 years of children born preterm--a matter of definition*. Acta Paediatr, 1995. **84**(10): p. 1160-4.
39. Largo, R.H., S. Graf, S. Kundu, U. Hunziker, and L. Molinari, *Predicting developmental outcome at school age from infant tests of normal, at-risk and retarded infants*. Dev Med Child Neurol, 1990. **32**(1): p. 30-45.

40. Luoma, L., E. Herrgard, A. Martikainen, and T. Ahonen, *Speech and language development of children born at < or = 32 weeks' gestation: a 5-year prospective follow-up study*. Dev Med Child Neurol, 1998. **40**(6): p. 380-7.
41. Bozynski, M.E., M.N. Nelson, C. Rosati-Skertich, D. Genaze, K. O'Donnell, and P. Naughton, *Two year longitudinal followup of premature infants weighing less than or equal to 1,200 grams at birth: sequelae of intracranial hemorrhage*. J Dev Behav Pediatr, 1984. **5**(6): p. 346-52.
42. Darlow, B.A., L.J. Horwood, N. Mogridge, and R.S. Clemett, *Survival and disability at 7-8 years of age in New Zealand infants less than 28 weeks gestation*. N Z Med J, 1998. **111**(1070): p. 264-7.
43. de Graaf, M.T., J.F. Samsom, E.M. Pettersen, V.A. Schaaf, P.E. van Schie, and L. de Groot, *Vestibulospinal component of postural control (vestibular function) in very preterm infants (25 to 27 weeks) at 3, 6, and 12 months corrected age*. J Child Neurol, 2004. **19**(8): p. 614-8.
44. D'Eugenio, D.B., T.A. Slagle, B.B. Mettelman, and S.J. Gross, *Developmental outcome of preterm infants with transient neuromotor abnormalities*. Am J Dis Child, 1993. **147**(5): p. 570-4.
45. Fawer, C.L., A. Calame, and M.T. Furrer, *Neurodevelopmental outcome at 12 months of age related to cerebral ultrasound appearances of high risk preterm infants*. Early Hum Dev, 1985. **11**(2): p. 123-32.
46. Roberts, J.L., H. Davis, G.L. Phon, T.J. Reichert, E.M. Sturtevant, and R.E. Marshall, *Auditory brainstem responses in preterm neonates: maturation and follow-up*. J Pediatr, 1982. **101**(2): p. 257-63.
47. Costello, A.M., P.A. Hamilton, J. Baudin, J. Townsend, B.C. Bradford, A.L. Stewart, and E.O. Reynolds, *Prediction of neurodevelopmental impairment at four years from brain ultrasound appearance of very preterm infants*. Dev Med Child Neurol, 1988. **30**(6): p. 711-22.
48. Houtzager BA, Gorter-Overdiek B, Van Sonderen L, Tamminga P, Van Wassenaer AG. *Improvement of developmental outcome between 24 and 36 months corrected age in very preterm infants*. Acta Paediatr. 2010. **99**(12):1801-6.
49. Lodha A, Zhu Q, Lee SK, Shah PS. *Neonatal outcomes of preterm infants in breech presentation according to mode of birth in Canadian NICUs*. Postgraduate medical journal. 2011. **87**(1025):175-9.

## Hypoxic-ischemic encephalopathy

1. Battin, M.R., J.A. Dezoete, T.R. Gunn, P.D. Gluckman, and A.J. Gunn, *Neurodevelopmental outcome of infants treated with head cooling and mild hypothermia after perinatal asphyxia*. Pediatrics, 2001. **107**(3): p. 480-4.
2. Petrovic, I., C. Klein, and V.S. Kostic, *Delayed-onset dystonia due to perinatal asphyxia: a prospective study*. Mov Disord, 2007. **22**(16): p. 2426-9.
3. Fitzhardinge, P.M., O. Flodmark, C.R. Fitz, and S. Ashby, *The prognostic value of computed tomography as an adjunct to assessment of the term infant with postasphyxial encephalopathy*. J Pediatr, 1981. **99**(5): p. 777-81.
4. Finer, N.N., C.M. Robertson, R.T. Richards, L.E. Pinnell, and K.L. Peters, *Hypoxic-ischemic encephalopathy in term neonates: perinatal factors and outcome*. J Pediatr, 1981. **98**(1): p. 112-7.
5. Mulligan, J.C., M.J. Painter, P.A. O'Donoghue, H.M. MacDonald, A.C. Allan, and P.M. Taylor, *Neonatal asphyxia. II. Neonatal mortality and long-term sequelae*. J Pediatr, 1980. **96**(5): p. 903-7.
6. Kjellmer, I., E. Beijer, G. Carlsson, A. Hrbek, and G. Viggedal, *Follow-up into young adulthood after cardiopulmonary resuscitation in term and near-term newborn infants. I. Educational achievements and social adjustment*. Acta Paediatr, 2002. **91**(11): p. 1212-7.
7. Lindstrom, K., P. Lagerroos, C. Gillberg, and E. Fernell, *Teenage outcome after being born at term with moderate neonatal encephalopathy*. Pediatr Neurol, 2006. **35**(4): p. 268-74.
8. Boo, N.Y., V. Chandran, M.A. Zulfiqar, S.M. Zamratol, M.K. Nyein, M.S. Haliza, and M.S. Lye, *Early cranial ultrasound changes as predictors of outcome during first year of life in term infants with perinatal asphyxia*. J Paediatr Child Health, 2000. **36**(4): p. 363-9.
9. Mercuri, E., D. Ricci, F.M. Cowan, D. Lessing, M.F. Frisone, L. Haataja, S.J. Counsell, L.M. Dubowitz, and M.A. Rutherford, *Head growth in infants with hypoxic-ischemic encephalopathy: correlation with neonatal magnetic resonance imaging*. Pediatrics, 2000. **106**(2 Pt 1): p. 235-43.
10. Muttitt, S.C., M.J. Taylor, J.S. Kobayashi, L. MacMillan, and H.E. Whyte, *Serial visual evoked potentials and outcome in term birth asphyxia*. Pediatr Neurol, 1991. **7**(2): p. 86-90.

11. Prechtl, H.F., F. Ferrari, and G. Cioni, *Predictive value of general movements in asphyxiated fullterm infants*. Early Hum Dev, 1993. **35**(2): p. 91-120.
12. Shankaran, S., E. Woldt, T. Koepke, M.P. Bedard, and R. Nandyal, *Acute neonatal morbidity and long-term central nervous system sequelae of perinatal asphyxia in term infants*. Early Hum Dev, 1991. **25**(2): p. 135-48.
13. Viggedal, G., E. Lundalv, G. Carlsson, and I. Kjellmer, *Follow-up into young adulthood after cardiopulmonary resuscitation in term and near-term newborn infants. II. Neuropsychological consequences*. Acta Paediatr, 2002. **91**(11): p. 1218-26.
14. L'Abée, C., L.S. de Vries, J. van der Grond, and F. Groenendaal, *Early diffusion-weighted MRI and 1H-Magnetic Resonance Spectroscopy in asphyxiated full-term neonates*. Biol Neonate, 2005. **88**(4): p. 306-12.
15. Jiang, Z.D., *Long-term effect of perinatal and postnatal asphyxia on developing human auditory brainstem responses: peripheral hearing loss*. Int J Pediatr Otorhinolaryngol, 1995. **33**(3): p. 225-38.
16. Groenendaal, F., J. van Hof-van Duin, W. Baerts, and W.P. Fetter, *Effects of perinatal hypoxia on visual development during the first year of (corrected) age*. Early Hum Dev, 1989. **20**(3-4): p. 267-79.
17. Roth, S.C., A.D. Edwards, E.B. Cady, D.T. Delpy, J.S. Wyatt, D. Azzopardi, J. Baudin, J. Townsend, A.L. Stewart, and E.O. Reynolds, *Relation between cerebral oxidative metabolism following birth asphyxia, and neurodevelopmental outcome and brain growth at one year*. Dev Med Child Neurol, 1992. **34**(4): p. 285-95.
18. Moster, D., R.T. Lie, and T. Markestad, *Joint association of Apgar scores and early neonatal symptoms with minor disabilities at school age*. Arch Dis Child Fetal Neonatal Ed, 2002. **86**(1): p. F16-21.
19. Thornberg, E., K. Thiringer, A. Odeback, and I. Milsom, *Birth asphyxia: incidence, clinical course and outcome in a Swedish population*. Acta Paediatr, 1995. **84**(8): p. 927-32.
20. Gluckman, P.D., J.S. Wyatt, D. Azzopardi, R. Ballard, A.D. Edwards, D.M. Ferriero, R.A. Polin, C.M. Robertson, M. Thoresen, A. Whitelaw, and A.J. Gunn, *Selective head cooling with mild systemic hypothermia after neonatal encephalopathy: multicentre randomised trial*. Lancet, 2005. **365**(9460): p. 663-70.
21. van Schie, P.E., J.G. Becher, A.J. Dallmeijer, F. Barkhof, M.M. Weissenbruch, and R.J. Vermeulen, *Motor outcome at the age of one after perinatal hypoxic-ischemic encephalopathy*. Neuropediatrics, 2007. **38**(2): p. 71-7.

22. Shah, P., S. Riphagen, J. Beyene, and M. Perlman, *Multiorgan dysfunction in infants with post-asphyxial hypoxic-ischaemic encephalopathy*. Arch Dis Child Fetal Neonatal Ed, 2004. **89**(2): p. F152-5.
23. Barnett, A., E. Mercuri, M. Rutherford, L. Haataja, M.F. Frisone, S. Henderson, F. Cowan, and L. Dubowitz, *Neurological and perceptual-motor outcome at 5 - 6 years of age in children with neonatal encephalopathy: relationship with neonatal brain MRI*. Neuropediatrics, 2002. **33**(5): p. 242-8.
24. Carli, G., I. Reiger, and N. Evans, *One-year neurodevelopmental outcome after moderate newborn hypoxic ischaemic encephalopathy*. J Paediatr Child Health, 2004. **40**(4): p. 217-20.
25. Ichiba, H., T. Yokoi, H. Tamai, T. Ueda, T.J. Kim, and T. Yamano, *Neurodevelopmental outcome of infants with birth asphyxia treated with magnesium sulfate*. Pediatr Int, 2006. **48**(1): p. 70-5.
26. Shankaran, S., A.R. Laptook, R.A. Ehrenkranz, J.E. Tyson, S.A. McDonald, E.F. Donovan, A.A. Fanaroff, W.K. Poole, L.L. Wright, R.D. Higgins, N.N. Finer, W.A. Carlo, S. Duara, W. Oh, C.M. Cotten, D.K. Stevenson, B.J. Stoll, J.A. Lemons, R. Guillet, and A.H. Jobe, *Whole-body hypothermia for neonates with hypoxic-ischemic encephalopathy*. N Engl J Med, 2005. **353**(15): p. 1574-84.
27. Hallioglu, O., A.K. Topaloglu, A. Zenciroglu, O. Duzovali, E. Yilgor, and S. Saribas, *Denver developmental screening test II for early identification of the infants who will develop major neurological deficit as a sequela of hypoxic-ischemic encephalopathy*. Pediatr Int, 2001. **43**(4): p. 400-4.
28. Azzopardi DV, Strohm B, Edwards AD, Dyet L, Halliday HL, Juszczak E, et al. *Moderate hypothermia to treat perinatal asphyxial encephalopathy*. The New England journal of medicine. 2009. Oct 1;361(14):1349-58.

### Neonatal jaundice

1. Crichton, J.U., H.G. Dunn, A.K. McBurney, A.M. Robertson, and E. Tredger, *Long-term effects of neonatal jaundice on brain function in children of low birth weight*. Pediatrics, 1972. **49**(5): p. 656-70.
2. Gordon, A.L., M. English, J. Tumaini Dzombo, M. Karisa, and C.R. Newton, *Neurological and developmental outcome of neonatal jaundice and sepsis in rural Kenya*. Trop Med Int Health, 2005. **10**(11): p. 1114-20.



3. Singh, K.B., A.K. Gupta, S.B. Mann, and A. Narang, *Comparative ABR profile in high risk infants*. *Auris Nasus Larynx*, 1998. **25**(2): p. 143-8.
4. de Vries, L.S., S. Lary, and L.M. Dubowitz, *Relationship of serum bilirubin levels to ototoxicity and deafness in high-risk low-birth-weight infants*. *Pediatrics*, 1985. **76**(3): p. 351-4.
5. Graziani, L.J., D.G. Mitchell, M. Kornhauser, F.S. Pidcock, D.A. Merton, C. Stanley, and L. McKee, *Neurodevelopment of preterm infants: neonatal neurosonographic and serum bilirubin studies*. *Pediatrics*, 1992. **89**(2): p. 229-34.
6. Naeye, R.L., *Amniotic fluid infections, neonatal hyperbilirubinemia, and psychomotor impairment*. *Pediatrics*, 1978. **62**(4): p. 497-503.
7. Newman, T.B. and M.A. Klebanoff, *Neonatal hyperbilirubinemia and long-term outcome: another look at the Collaborative Perinatal Project*. *Pediatrics*, 1993. **92**(5): p. 651-7.
8. Scheidt, P.C., B.I. Graubard, K.B. Nelson, D.G. Hirtz, H.J. Hoffman, L.M. Gartner, and D.A. Bryla, *Intelligence at six years in relation to neonatal bilirubin levels: follow-up of the National Institute of Child Health and Human Development Clinical Trial of Phototherapy*. *Pediatrics*, 1991. **87**(6): p. 797-805.
9. van de Bor, M., T.M. van Zeben-van der Aa, S.P. Verloove-Vanhorick, R. Brand, and J.H. Ruys, *Hyperbilirubinemia in preterm infants and neurodevelopmental outcome at 2 years of age: results of a national collaborative survey*. *Pediatrics*, 1989. **83**(6): p. 915-20.
10. Abramovich, S.J., S. Gregory, M. Slemick, and A. Stewart, *Hearing loss in very low birthweight infants treated with neonatal intensive care*. *Arch Dis Child*, 1979. **54**(6): p. 421-6.
11. Oh, W., J.E. Tyson, A.A. Fanaroff, B.R. Vohr, R. Perritt, B.J. Stoll, R.A. Ehrenkranz, W.A. Carlo, S. Shankaran, K. Poole, and L.L. Wright, *Association between peak serum bilirubin and neurodevelopmental outcomes in extremely low birth weight infants*. *Pediatrics*, 2003. **112**(4): p. 773-9.
12. Sabatino, G., A. Verrotti, L.A. Ramenghi, S. Domizio, D. Melchionda, T. Fulgente, C. Paci, G.D. Andreamatteo, A. Thomas, and M. Onofri, *Newborns with hyperbilirubinemia: usefulness of brain stem auditory response evaluation*. *Neurophysiol Clin*, 1996. **26**(6): p. 363-8.

13. Agrawal, V.K., R. Shukla, P.K. Misra, R.K. Kapoor, and G.K. Malik, *Brainstem auditory evoked response in newborns with hyperbilirubinemia*. Indian Pediatr, 1998. **35**(6): p. 513-8.
14. Wolf, M.J., G. Beunen, P. Casaer, and B. Wolf, *Extreme hyperbilirubinaemia in Zimbabwean neonates: neurodevelopmental outcome at 4 months*. Eur J Pediatr, 1997. **156**(10): p. 803-7.
15. Harris, M.C., J.C. Bernbaum, J.R. Polin, R. Zimmerman, and R.A. Polin, *Developmental follow-up of breastfed term and near-term infants with marked hyperbilirubinemia*. Pediatrics, 2001. **107**(5): p. 1075-80.
16. Duman, N., H. Ozkan, B. Serbetcioglu, B. Ogun, A. Kumral, and M. Avci, *Long-term follow-up of otherwise healthy term infants with marked hyperbilirubinaemia: should the limits of exchange transfusion be changed in Turkey?* Acta Paediatr, 2004. **93**(3): p. 361-7.
17. Funato, M., S. Teraoka, H. Tamai, and S. Shimida, *Follow-up study of auditory brainstem responses in hyperbilirubinemic newborns treated with exchange transfusion*. Acta Paediatr Jpn, 1996. **38**(1): p. 17-21.
18. Yilmaz, Y., S. Degirmenci, F. Akdas, S. Kulekci, A. Ciprut, S. Yuksel, F. Yildiz, L. Karadeniz, and A. Say, *Prognostic value of auditory brainstem response for neurologic outcome in patients with neonatal indirect hyperbilirubinemia*. J Child Neurol, 2001. **16**(10): p. 772-5.
19. Rosta, J., Z. Makoi, D. Bekefi, P. Popper, S. Szinetar, L. Szego, M. Szabo, M. Szendroi, and O. Ribari, *Neonatal pathologic jaundice: seven to nine years follow-up*. Acta Paediatr Acad Sci Hung, 1971. **12**(3): p. 317-21.
20. Paul, S.S., V. Thomas, and D. Singh, *Outcome of neonatal hyperbilirubinemia managed with exchange transfusion*. Indian Pediatr, 1988. **25**(8): p. 765-9.
21. Mukhopadhyay K, Chowdhary G, Singh P, Kumar P, Narang A. *Neurodevelopmental outcome of acute bilirubin encephalopathy*. Journal of tropical pediatrics. 2010. **56**(5):333-6.

## Neonatal Meningitis

1. Stoll, B.J., N.I. Hansen, I. Adams-Chapman, A.A. Fanaroff, S.R. Hintz, B. Vohr, and R.D. Higgins, *Neurodevelopmental and growth impairment among extremely low-birth-weight infants with neonatal infection*. *Jama*, 2004. **292**(19): p. 2357-65.
2. Benjamin, D.K., Jr., B.J. Stoll, A.A. Fanaroff, S.A. McDonald, W. Oh, R.D. Higgins, S. Duara, K. Poole, A. Laptook, and R. Goldberg, *Neonatal candidiasis among extremely low birth weight infants: risk factors, mortality rates, and neurodevelopmental outcomes at 18 to 22 months*. *Pediatrics*, 2006. **117**(1): p. 84-92.
3. Singh, K.B., A.K. Gupta, S.B. Mann, and A. Narang, *Comparative ABR profile in high risk infants*. *Auris Nasus Larynx*, 1998. **25**(2): p. 143-8.
4. Fitzgerald, K.C. and M.R. Golomb, *Neonatal arterial ischemic stroke and sinovenous thrombosis associated with meningitis*. *J Child Neurol*, 2007. **22**(7): p. 818-22.
5. Klinger, G., C.N. Chin, J. Beyene, and M. Perlman, *Predicting the outcome of neonatal bacterial meningitis*. *Pediatrics*, 2000. **106**(3): p. 477-82.
6. Stevens, J.P., M. Eames, A. Kent, S. Halket, D. Holt, and D. Harvey, *Long term outcome of neonatal meningitis*. *Arch Dis Child Fetal Neonatal Ed*, 2003. **88**(3): p. F179-84.
7. Chin, K.C. and P.M. Fitzhardinge, *Sequelae of early-onset group B hemolytic streptococcal neonatal meningitis*. *J Pediatr*, 1985. **106**(5): p. 819-22.
8. Fitzhardinge, P.M., M. Kazemi, M. Ramsay, and L. Stern, *Long-term sequelae of neonatal meningitis*. *Dev Med Child Neurol*, 1974. **16**(1): p. 3-8.
9. Franco, S.M., V.E. Cornelius, and B.F. Andrews, *Long-term outcome of neonatal meningitis*. *Am J Dis Child*, 1992. **146**(5): p. 567-71.
10. Haslam, R.H., J.R. Allen, M.M. Dorsen, D.L. Kanofsky, E.D. Mellitus, and D.A. Norris, *The sequelae of group B beta-hemolytic streptococcal meningitis in early infancy*. *Am J Dis Child*, 1977. **131**(8): p. 845-9.

## Neonatal sepsis

1. Gordon, A.L., M. English, J. Tumaini Dzombo, M. Karisa, and C.R. Newton, *Neurological and developmental outcome of neonatal jaundice and sepsis in rural Kenya*. Trop Med Int Health, 2005. **10**(11): p. 1114-20.
2. Stoll, B.J., N.I. Hansen, I. Adams-Chapman, A.A. Fanaroff, S.R. Hintz, B. Vohr, and R.D. Higgins, *Neurodevelopmental and growth impairment among extremely low-birth-weight infants with neonatal infection*. Jama, 2004. **292**(19): p. 2357-65.
3. Friedman, S., S.E. Richardson, S.E. Jacobs, and K. O'Brien, *Systemic Candida infection in extremely low birth weight infants: short term morbidity and long term neurodevelopmental outcome*. Pediatr Infect Dis J, 2000. **19**(6): p. 499-504.
4. Benjamin, D.K., Jr., B.J. Stoll, A.A. Fanaroff, S.A. McDonald, W. Oh, R.D. Higgins, S. Duara, K. Poole, A. Laptook, and R. Goldberg, *Neonatal candidiasis among extremely low birth weight infants: risk factors, mortality rates, and neurodevelopmental outcomes at 18 to 22 months*. Pediatrics, 2006. **117**(1): p. 84-92.
5. Singh, K.B., A.K. Gupta, S.B. Mann, and A. Narang, *Comparative ABR profile in high risk infants*. Auris Nasus Larynx, 1998. **25**(2): p. 143-8.

## Cytomegalovirus

1. Johnson, S.J., H. Hosford-Dunn, S. Paryani, A. Yeager, and N. Malachowski, *Prevalence of sensorineural hearing loss in premature and sick term infants with perinatally acquired cytomegalovirus infection*. Ear Hear, 1986. **7**(5): p. 325-7.
2. Lanari, M., T. Lazzarotto, V. Venturi, I. Papa, L. Gabrielli, B. Guerra, M.P. Landini, and G. Faldella, *Neonatal cytomegalovirus blood load and risk of sequelae in symptomatic and asymptomatic congenitally infected newborns*. Pediatrics, 2006. **117**(1): p. e76-83.
3. Rivera, L.B., S.B. Boppana, K.B. Fowler, W.J. Britt, S. Stagno, and R.F. Pass, *Predictors of hearing loss in children with symptomatic congenital cytomegalovirus infection*. Pediatrics, 2002. **110**(4): p. 762-7.

4. Preece, P.M., K.N. Pearl, and C.S. Peckham, *Congenital cytomegalovirus infection*. Arch Dis Child, 1984. **59**(12): p. 1120-6.
5. Berenberg, W. and G. Nankervis, *Long-term follow-up of cytomegalic inclusion disease of infancy*. Pediatrics, 1970. **46**(3): p. 403-10.
6. Harris, S., K. Ahlfors, S. Ivarsson, B. Lernmark, and L. Svanberg, *Congenital cytomegalovirus infection and sensorineural hearing loss*. Ear Hear, 1984. **5**(6): p. 352-5.
7. Boppana, S.B., K.B. Fowler, Y. Vaid, G. Hedlund, S. Stagno, W.J. Britt, and R.F. Pass, *Neuroradiographic findings in the newborn period and long-term outcome in children with symptomatic congenital cytomegalovirus infection*. Pediatrics, 1997. **99**(3): p. 409-14.
8. Kimberlin, D.W., C.Y. Lin, P.J. Sanchez, G.J. Demmler, W. Dankner, M. Shelton, R.F. Jacobs, W. Vaudry, R.F. Pass, J.M. Kiell, S.J. Soong, and R.J. Whitley, *Effect of ganciclovir therapy on hearing in symptomatic congenital cytomegalovirus disease involving the central nervous system: a randomized, controlled trial*. J Pediatr, 2003. **143**(1): p. 16-25.
10. Pass, R.F., S. Stagno, G.J. Myers, and C.A. Alford, *Outcome of symptomatic congenital cytomegalovirus infection: results of long-term longitudinal follow-up*. Pediatrics, 1980. **66**(5): p. 758-62.
11. Williamson, W.D., A.K. Percy, M.D. Yow, P. Gerson, F.I. Catlin, M.L. Koppelman, and S. Thurber, *Asymptomatic congenital cytomegalovirus infection. Audiologic, neuroradiologic, and neurodevelopmental abnormalities during the first year*. Am J Dis Child, 1990. **144**(12): p. 1365-8.
12. de Vries, L.S., H. Gunardi, P.G. Barth, L.A. Bok, M.A. Verboon-Maciolek, and F. Groenendaal, *The spectrum of cranial ultrasound and magnetic resonance imaging abnormalities in congenital cytomegalovirus infection*. Neuropediatrics, 2004. **35**(2): p. 113-9.
13. Fowler, K.B., S. Stagno, R.F. Pass, W.J. Britt, T.J. Boll, and C.A. Alford, *The outcome of congenital cytomegalovirus infection in relation to maternal antibody status*. N Engl J Med, 1992. **326**(10): p. 663-7.
14. Kylat, R.I., E.N. Kelly, and E.L. Ford-Jones, *Clinical findings and adverse outcome in neonates with symptomatic congenital cytomegalovirus (SCCMV) infection*. Eur J Pediatr, 2006. **165**(11): p. 773-8.

15. Hanshaw, J.B., A.P. Scheiner, A.W. Moxley, L. Gaev, V. Abel, and B. Scheiner, *School failure and deafness after "silent" congenital cytomegalovirus infection*. N Engl J Med, 1976. **295**(9): p. 468-70.
16. Melish, M.E. and J.B. Hanshaw, *Congenital cytomegalovirus infection. Developmental progress of infants detected by routine screening*. Am J Dis Child, 1973. **126**(2): p. 190-4.
17. Reynolds, D.W., S. Stagno, K.G. Stubbs, A.J. Dahle, M.M. Livingston, S.S. Saxon, and C.A. Alford, *Inapparent congenital cytomegalovirus infection with elevated cord IgM levels. Casual relation with auditory and mental deficiency*. N Engl J Med, 1974. **290**(6): p. 291-6.
18. Milewska-Bobula B, Zebrowska J, Olszaniecka M, Pijanowska S, Radziszewska-Konopka M, Lipka B. *Evaluation of intellectual development of children following congenital, mildly symptomatic cytomegalovirus (CMV) infection. A prospective study*. Medycyna wieku rozwojowego. 2010. **14**(4):370-3.
19. Waters A, Hassan J, De Gascun C, Kissoon G, Knowles S, Molloy E, et al. *Human cytomegalovirus UL144 is associated with viremia and infant development sequelae in congenital infection*. Journal of clinical microbiology. 2010. **48**(11):3956-62.

## Herpes

1. Kimberlin, D.W., C.Y. Lin, R.F. Jacobs, D.A. Powell, L.M. Frenkel, W.C. Gruber, M. Rathore, J.S. Bradley, P.S. Diaz, M. Kumar, A.M. Arvin, K. Gutierrez, M. Shelton, L.B. Weiner, J.W. Sleasman, T.M. de Sierra, S.J. Soong, J. Kiell, F.D. Lakeman, and R.J. Whitley, *Natural history of neonatal herpes simplex virus infections in the acyclovir era*. Pediatrics, 2001. **108**(2): p. 223-9.
2. Dahle, A.J. and F.P. McCollister, *Audiological findings in children with neonatal herpes*. Ear Hear, 1988. **9**(5): p. 256-8.
3. Tiffany, K.F., D.K. Benjamin, Jr., P. Palasanthiran, K. O'Donnell, and L.T. Gutman, *Improved neurodevelopmental outcomes following long-term high-dose oral acyclovir therapy in infants with central nervous system and disseminated herpes simplex disease*. J Perinatol, 2005. **25**(3): p. 156-61.

4. Toth, C., S. Harder, and J. Yager, *Neonatal herpes encephalitis: a case series and review of clinical presentation*. Can J Neurol Sci, 2003. **30**(1): p. 36-40.
5. Elder, D.E., C. Minutillo, and P.J. Pemberton, *Neonatal herpes simplex infection: keys to early diagnosis*. J Paediatr Child Health, 1995. **31**(4): p. 307-11.
6. Malouf, D.J. and R.K. Oates, *Herpes simplex virus infections in the neonate*. J Paediatr Child Health, 1995. **31**(4): p. 332-5.
7. Malm, G., M. Forsgren, M. el Azazi, and A. Persson, *A follow-up study of children with neonatal herpes simplex virus infections with particular regard to late nervous disturbances*. Acta Paediatr Scand, 1991. **80**(2): p. 226-34.
8. el Azazi, M., G. Malm, and M. Forsgren, *Late ophthalmologic manifestations of neonatal herpes simplex virus infection*. Am J Ophthalmol, 1990. **109**(1): p. 1-7.
9. Corey, L., R.J. Whitley, E.F. Stone, and K. Mohan, *Difference between herpes simplex virus type 1 and type 2 neonatal encephalitis in neurological outcome*. Lancet, 1988. **1**(8575-6): p. 1-4.

## Rubella

1. Desmond, M.M., G.S. Wilson, J.L. Melnick, D.B. Singer, T.E. Zion, A.J. Rudolph, R.G. Pineda, M.H. Ziai, and R.J. Blattner, *Congenital rubella encephalitis. Course and early sequelae*. J Pediatr, 1967. **71**(3): p. 311-31.
2. Munro, N.D., S. Sheppard, R.W. Smithells, H. Holzel, and G. Jones, *Temporal relations between maternal rubella and congenital defects*. Lancet, 1987. **2**(8552): p. 201-4.
3. Hardy, M.P., H.L. Haskins, W.G. Hardy, and H. Shimizu, *Rubella: audiologic evaluation and follow-up*. Arch Otolaryngol, 1973. **98**(4): p. 237-45.
4. Streissguth, A.P., B.B. Vanderveer, and T.H. Shepard, *Mental development of children with congenital rubella syndrome. A preliminary report*. Am J Obstet Gynecol, 1970. **108**(3): p. 391-9.
5. Zgorniak-Nowosielska, I., B. Zawilinska, and S. Szostek, *Rubella infection during pregnancy in the 1985-86 epidemic: follow-up after seven years*. Eur J Epidemiol, 1996. **12**(3): p. 303-8.

6. O'Neill, J.F., *The ocular manifestations of congenital infection: a study of the early effect and long-term outcome of maternally transmitted rubella and toxoplasmosis*. Trans Am Ophthalmol Soc, 1998. **96**: p. 813-79

### **Toxoplasmosis**

1. Safadi, M.A., E.N. Berezin, C.K. Farhat, and E.S. Carvalho, *Clinical presentation and follow up of children with congenital toxoplasmosis in Brazil*. Braz J Infect Dis, 2003. **7**(5): p. 325-31.
2. Tan, H.K., D. Schmidt, M. Stanford, K. Tear-Fahnehjelm, N. Ferret, A. Salt, and R. Gilbert, *Risk of visual impairment in children with congenital toxoplasmic retinochoroiditis*. Am J Ophthalmol, 2007. **144**(5): p. 648-653.
3. Roizen, N., C.N. Swisher, M.A. Stein, J. Hopkins, K.M. Boyer, E. Holfels, M.B. Mets, L. Stein, D. Patel, P. Meier, and et al., *Neurologic and developmental outcome in treated congenital toxoplasmosis*. Pediatrics, 1995. **95**(1): p. 11-20.
4. O'Neill, J.F., *The ocular manifestations of congenital infection: a study of the early effect and long-term outcome of maternally transmitted rubella and toxoplasmosis*. Trans Am Ophthalmol Soc, 1998. **96**: p. 813-79
5. Wilson, C.B., J.S. Remington, S. Stagno, and D.W. Reynolds, *Development of adverse sequelae in children born with subclinical congenital Toxoplasma infection*. Pediatrics, 1980. **66**(5): p. 767-74.
6. Berrebi A, Assouline C, Bessieres MH, Lathiere M, Cassaing S, Minville V, et al. Long-term outcome of children with congenital toxoplasmosis. American journal of obstetrics and gynecology. 2010. **203**(6):552 e1-6.

### **Neonatal tetanus**

1. Barlow, J.L., V. Mung'Ala-Odera, J. Gona, and C.R. Newton, *Brain damage after neonatal tetanus in a rural Kenyan hospital*. Trop Med Int Health, 2001. **6**(4): p. 305-8.
2. Teknetzi, P., S. Manios, and V. Katsouyanopoulos, *Neonatal tetanus--long-term residual handicaps*. Arch Dis Child, 1983. **58**(1): p. 68-9.



3. Anlar, B., K. Yalaz, and R. Dizmen, *Long-term prognosis after neonatal tetanus*. Dev Med Child Neurol, 1989. **31**(1): p. 76-80.
4. Khanna, S.S., B. Bharucha, A.K. Bhatia, and F.D. Dastur, *Neonatal tetanus: psychomotor development in survivors*. Indian Pediatr, 1985. **22**(2): p. 125-30.

## HIV

1. McGrath, N., W.W. Fawzi, D. Bellinger, J. Robins, G.I. Msamanga, K. Manji, and E. Tronick, *The timing of mother-to-child transmission of human immunodeficiency virus infection and the neurodevelopment of children in Tanzania*. Pediatr Infect Dis J, 2006. **25**(1): p. 47-52.
2. Smith, R., K. Malee, M. Charurat, L. Magder, C. Mellins, C. Macmillan, J. Hittleman, T. Lasky, A. Llorente, and J. Moye, *Timing of perinatal human immunodeficiency virus type 1 infection and rate of neurodevelopment. The Women and Infant Transmission Study Group*. Pediatr Infect Dis J, 2000. **19**(9): p. 862-71.
